# Supplementary material for: Plasminogen activator, urokinase enhances the migration, invasion, and proliferation of colorectal cancer cells by activating the Src/ERK pathway
Source: PubMed Central journal article supplement — J Gastrointest Oncol. 2022 Dec;13(6):3100–11. doi: 10.21037/jgo-22-1215 (PMC9830328; doi:10.21037/jgo-22-1215), 2022-12
Supplement: jgo-13-06-3100-dss.pdf [file jgo-13-06-3100-dss.pdf]

## Data Sharing Statement

|                     |                                                                                                                                                     |                                                                                      |
|---------------------|-----------------------------------------------------------------------------------------------------------------------------------------------------|--------------------------------------------------------------------------------------|
| <b>Article Info</b> | <a href="https://dx.doi.org/10.21037/jgo-22-1215">https://dx.doi.org/10.21037/jgo-22-1215</a>                                                       |                                                                                      |
| <b>Item</b>         | <b>Question</b>                                                                                                                                     | <b>Authors' Response<br/>(place "-" if not applicable)</b>                           |
| 1                   | Would you like to share data collected for your study to others?                                                                                    | Yes.                                                                                 |
| 2                   | If not, would you like to share the reason for your decision?                                                                                       | Not applicable.                                                                      |
| 3                   | What data in particular will be shared?                                                                                                             | Related cell transfection and all results data detail information.                   |
| 4                   | Any other documents will be shared? Such as study protocol, statistical analysis plan, informed consent form, clinical study report, analytic code. | The raw data and statistical analysis methods can be shared.                         |
| 5                   | When will data availability begin?                                                                                                                  | Once the manuscript is published.                                                    |
| 6                   | When will data availability end?                                                                                                                    | Two years after the publication.                                                     |
| 7                   | To whom will you share the data?                                                                                                                    | All researchers are interested in PLAU inhibition regent development.                |
| 8                   | For what type of analysis or purpose?                                                                                                               | For laboratory research.                                                             |
| 9                   | How or where can the data/documents be obtained?                                                                                                    | Emails could be sent to the address below to obtain the shared data: yb@hebmu.edu.cn |
| 10                  | Any other restrictions?                                                                                                                             | Data is used only for reference.                                                     |
